# Supplementary material
Source: Springer Nature journal article supplement (https://www.springermedizin.de/resource/supplementary/12947_2011_415_MOESM2_ESM.pdf/9555694)

FLEMENGHO plasma NT-proBNP

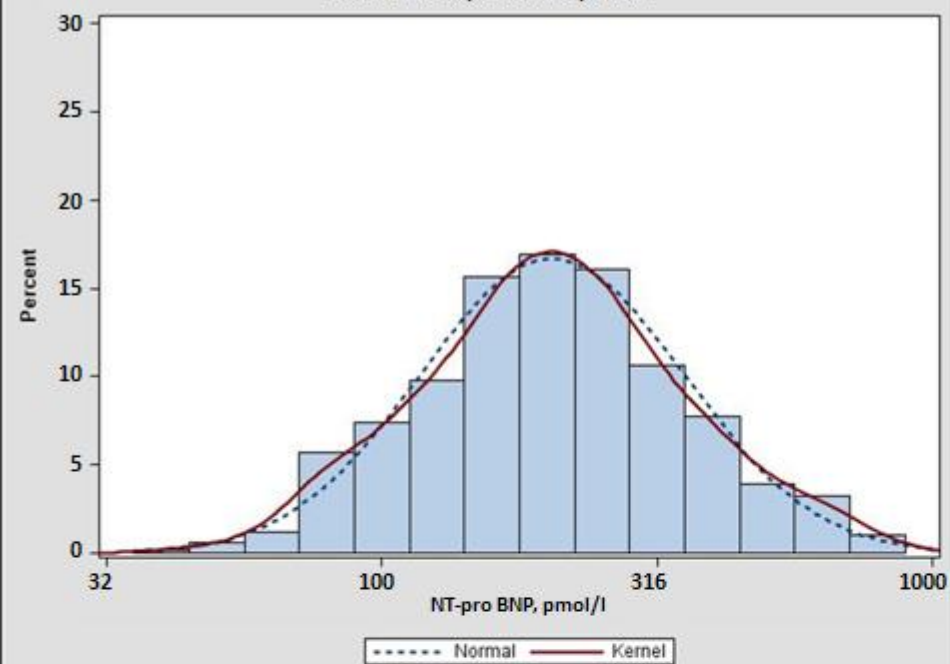

EPOGH serum NT-proBNP

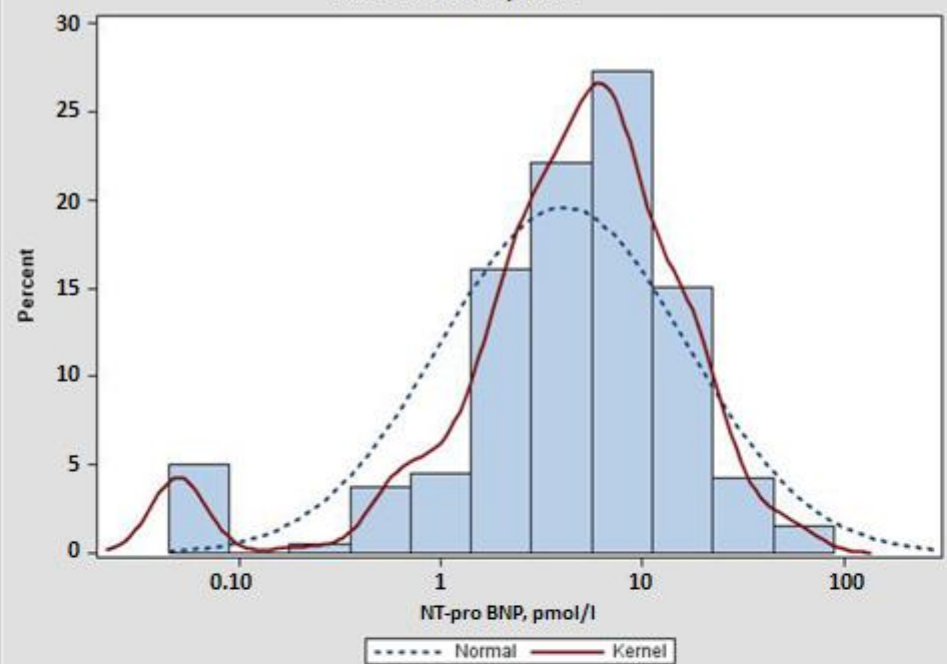

FLEMENGHO plasma NT-proBNP

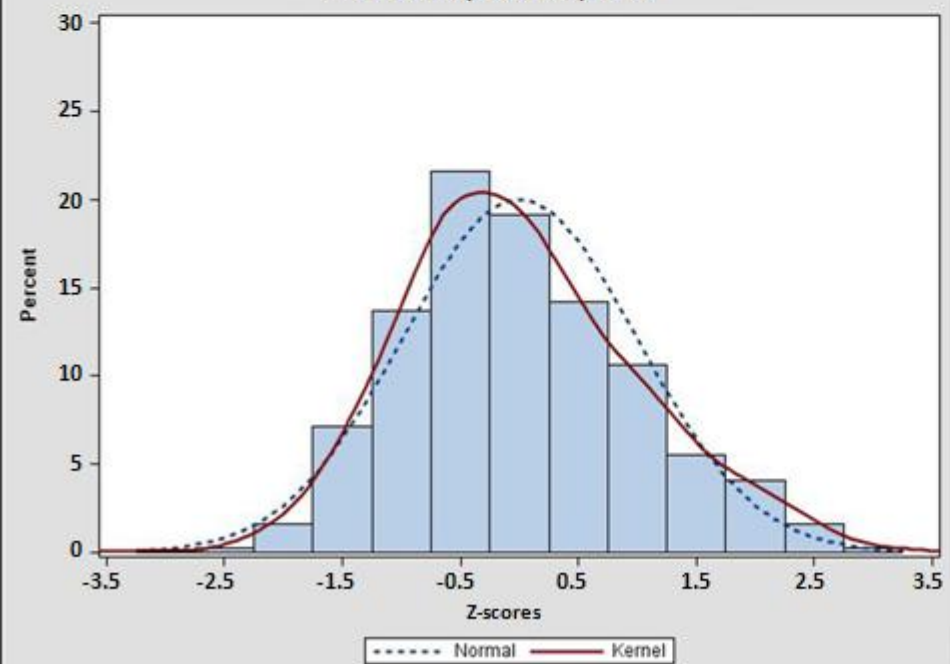

EPOGH serum NT-proBNP

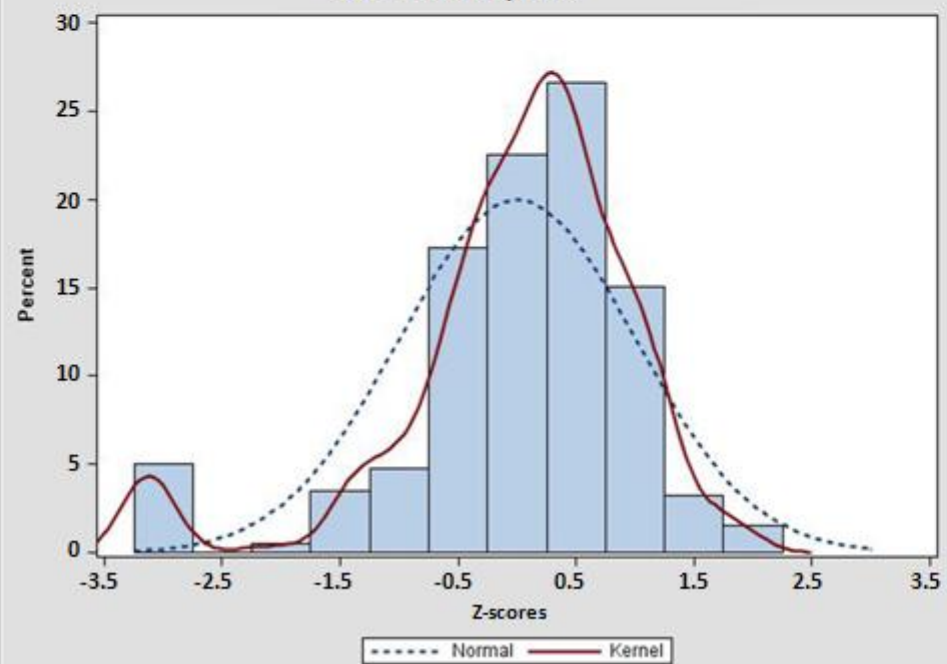

Supplement: MOESM2 [file 9555694]
